# Supplementary material for: Translation and validation of the Child and the Adolescent HARDSHIP (Headache-attributed restriction, disability, social handicap and impaired participation) questionnaire into Danish language
Source: PeerJ. 2016 Apr 14;4:e1927. doi: 10.7717/peerj.1927 (PMC4841233; doi:10.7717/peerj.1927)
Supplement: Data S2 — HARDSHIP data age 12–17. [file peerj-04-1927-s005.xlsx]

## Sheet: Ark1
Tidsstempel	1.Hvilken dato er det i dag?	2. Hvor gammel er du?	3. Er du en en dreng eller en pige ?	4. Har du nogensinde haft hovedpine?	5.Har du haft hovedpine indenfor det sidste år ?	6. Hvor lang tid plejer din hovedpine at vare?	7. Hvor slem er din hovedpine?	8. Hvordan beskrives bedst din hovedpine?	9. Mærker du normalt din hovedpine i den ene side af hovedet , i midten eller i begge sider?	10. Får bevægelse ( f.eks gang eller at gå på trapper) din hovedpine til at blive værre?	11. Undgår du bevægelse, (f.eks gang eller at gå på trapper ), når du har hovedpine	12. Føler du dig syg, når du har hovedpine? ( som om du skal kaste op	13. Er du syg, når du har hovedpine( kaster du f.eks op)	14. Kan du bedst lide at være i mørke,når du har hovedpine?	15. Kan du bedst lide, at der er stille omkring dig , når du har hovedpine	16. Hvor mange dage havde du hovedpine i løbet af den sidste uge	17.Hvor mange dage i løbet af den sidste uge har du taget medicineller piller på grund af din hovedpine?	18. Hvor mange dage i løbet af de sidste fire uger har du haft hovedpine ?	19. Hvor mange dage i løbet af de sidste fire uger har du taget medicin eller piller på grund af din hovedpine	20. Hvor mange dage, i løbet af de sidste fire uger, har du ikke været i skole på grund af hovedpine?	21. Hvor mange dage i løbet af de sidste fire uger er du taget tidligere hjem fra skole på grund af hovedpine?	22. Hvor mange dage i løbet af de sidste fire uger, har du ikke kunne gør ting du gerne ville på grund af din hovedpine?	23. Har dine forældre , i løbet af de sidste fire uger, været hjemme fordi du havde hovedpine?	24. Havde du hovedpine i går?	25. Hvor slemt var det?	26. Gik du glip af skolen i går?	27. Jeg har været bange for at få hovedpine	28. Jeg måtte ikke lave noget for mine forældre, fordi jeg havde hovedpine	29. Jeg kunne ikke koncentrere mig, fordi jeg havde hovedpine	30. Jeg har været ked af det på grund af min hovedpine	31. Jeg har været i stand til at håndtere min hovedpine	32. Jeg ville ikke have, at nogen skulle opdage, at jeg havde hovedpine	33. Jeg har følt mig syg	34. Jeg har været træt og udkørt	35. Jeg har haft en masse energi	36. Jeg har haft det sjovt og har grinet meget	37. Jeg har kedet mig	38. Jeg har følt mig alene	39. Jeg har været bange	40. Jeg har været tilfreds med mig selv	41. Jeg har haft det godt derhjemme	42. Jeg har haft det fint med mine venner	43. Jeg har følt mig anderledes i forhold til andre børn	44. Det har været nemt at lave mine lektiet
kode	tallet		0=dreng, 1= pige	ja= 0, nej =1	ja=0, nej =1	u1time=0, 1-2 timer=1, 2-4 timer= 2, mere end 4 timer = 3	ikke slemt=0, ret slemt =2, meget slem=2	trykkende = 0, dunkende= 1	en side=0, midten = 1, begge sider= 2	ja =0, nej = 1	ja = 0, nej = 1	ja = 0, nej = 1	ja=0, nej =1	ja=0, nej = 1	ja =0, nej =1	antal	antal	antal	antal	antal	antal	antal	ja=0, nej=1, antal	ja=0,nej=1	ikke slemt =0, slemt =1, ret slemt =2	nej=0, ja gik tidligere hjem=1, ja kom ikke i skole=2	aldrig=0, ja nogle gange=1, ja ofte=2, ja altid= 3	aldrig=0, ja nogle gange=1, ja ofte=2, ja altid= 3	aldrig=0, ja nogle gange=1, ja ofte=2, ja altid= 3	aldrig=0, ja nogle gange=1, ja ofte=2, ja altid= 3	aldrig=0, ja nogle gange=1, ja ofte=2, ja altid= 3	aldrig=0, ja nogle gange=1, ja ofte=2, ja altid= 3	aldrig=0, ja nogle gange=1, ja ofte=2, ja altid= 3	aldrig=0, ja nogle gange=1, ja ofte=2, ja altid= 3	aldrig=0, ja nogle gange=1, ja ofte=2, ja altid= 3	aldrig=0, ja nogle gange=1, ja ofte=2, ja altid= 3	aldrig=0, ja nogle gange=1, ja ofte=2, ja altid= 3	aldrig=0, ja nogle gange=1, ja ofte=2, ja altid= 3	aldrig=0, ja nogle gange=1, ja ofte=2, ja altid= 3	aldrig=0, ja nogle gange=1, ja ofte=2, ja altid= 3	aldrig=0, ja nogle gange=1, ja ofte=2, ja altid= 3	aldrig=0, ja nogle gange=1, ja ofte=2, ja altid= 3	aldrig=0, ja nogle gange=1, ja ofte=2, ja altid= 3	aldrig=0, ja nogle gange=1, ja ofte=2, ja altid= 3
42166.4	11-06-2015	15	0	0	1																												1	1	2	2	1	0	0	2	1	3	0	1
42166.4	11-06-2015	15	0	0	1																												1	2	1	2	2	1	0	2	3	3	0	1
42166.4	10/6	14	0	0	1																												1	2	2	2	1	1	0	1	3	2	1	2
42166.4	11-06-2015	16	0	1	1																												3	1	2	2	1	0	0	2	3	3	0	2
42166.4	11/06/2015	14	0	0	0	1	0	0	1	0	0	1	1	0	0	0	0	1	0	0	0	0	1	1			0	0	1	0	0	3	1	0	2	1	1	0	0	2	3	3	0	2
42166.4	11/6	15	0	0	0	0	0	1	2	1	1	0	0	1	1	0	0	0	0	0	0	0	1	1			0	1	1	0	2	3	1	1	1	2	1	0	0	2	2	2	0	0
42166.4	11/06-15	15	0	0	0	1	0	1	1	0	1	1	1	1	0	1	0	1	0	0	0	0	1	1			0	1	1	0	2	3	3	11	2	3	0	0	0	2	3	3	1	3
42166.4	11/6	14	0	0	0	0	0	1	1	1	1	1	1	1	1	0	0	0	0	0	0	0	1	1			0	0	0	0	3	3	3	1	1	2	0	0	0	3	3	3	1	3
42166.4	11/6-2015	14	1	0	0	1	1	0	2	0	0	1	1	1	0	2	0	6	0	0	0	0	1	1			1	0	1	0	3	3	1	1	2	3	2	0	0	2	3	2	0	0
42166.4	d. 11 Juni	15	1	0	0	1	1	0	1	1	1	1	1	0	0	4	1	16	5	0	0	0	1	0	1	0	0	0	1	0	1	3	1	1	1	2	1	0	0	1	1	2	1	1
42166.4	11-01-2015	15	0	0	0	1	0	1	0	1	1	1	1	0	1	0	0	0	0	0	0	0	1	1			0	0	1	0	3	3	1	2	2	2	2	1	0	2	3	3	0	3
42166.4	11-06-2015	15	0	0	0	2	1	0	1	1	0	0	0	0	0	0	0	0	0	0	1	0	1	1			0	0	0	0	0	3	3	0	3	3	1	3	1	1	1	2	0	3
42166.4	11-06-2015	14	1	0	0	1	0	0	2	0	0	1	1	1	0	0	0	2	0	0	0	0	1	1			1	0	1	0	2	1	1	1	2	2	1	1	0	1	2	3	0	2
42166.4	11/6	15	0	0	0	1	1	0	1	1	1	1	1	1	0	0	0	0	0	0	9	0	1	1			1	2	1	0	1	1	1	1	1	0	1	0	0	2	3	3	0	1
42166.4	11/6	15	0	0	0	1	1	0	1	0	1	0	1	1	0	0	0	0	0	0	0	0	1	1			0	0	0	0	2	3	3	1	2	1	1	0	0	1	2	3	0	3
42166.4	11/6	14	0	0	0	1	0	1	0	1	1	0	1	1	0	0	0	0	0	0	0	0	1	1			0	0	1	0	1	3	1	1	1	2	1	0	1	2	3	3	1	2
42166.4	11-06-2015	15	1	0	0	1	0	0	2	1	1	1	1	11	0	0	0	0	0	0	0	0	1	1			0	1	1	0	3	3	1	3	0	0	1	0	0	2	3	3	0	2
42166.4	11/7	15	1	0	0	1	2	1	0	0	0	1	1	0	0	1	1	4	4	0	0	1	1	0	1	0	0	0	1	0	3	3	1	2	1	3	1	0	0	2	2	3	0	3
42166.4	11 juni	15	0	0	0	0	1	0	1	1	1	1	1	1	0	0	0	0	0	0	0	0	1	1			0	0	1	0	3	3	1	1	2	3	0	0	0	2	3	3	0	3
42166.4	11 juni	14	1	0	0	0	1	0	1	1	1	1	1	1	0	0	0	1	0	0	0	0	1	1			0	0	1	0	3	3	3	2	1	1	1	0	0	1	2	3	0	2
42166.4	11/7	15	1	0	0	3	2	0	2	0	1	0	1	0	0	0	0	3	9	5	2	9	1	1			1	0	2	2	1	0	1	2	1	1	2	2	0	0	2	1	1	1
42166.4	det ved jeg ikke	15	0	1	1																												1	1	2	2	1	0	0	2	3	3	1	1
42166.4	11/6-2015	15	1	0	0	1	1	0	2	0	1	1	1	1	0	0	0	2	0	0	0	1	1	1			0	0	1	0	2	3	1	1	3	2	1	0	0	1	3	3	0	2
42166.4	11-6-2015	14	0	0	0	3	1	1	1	0	0	0	0	0	0	0	0	1	1	1	0	1	1	1			2	0	1	0	0	3	1	2	1	1	1	1	0	1	2	2	1	1
42166.4	11/6	15	1	0	0	3	1	1	2	1	0	1	1	1	0	0	0	3	1	0	0	1	1	1			1	0	2	1	2	1	1	2	1	1	1	3	2	0	2	3	2	2
42166.4	11/06-2015	14	1	0	1																												3	2	2	3	1	0	1	3	3	3	1	1
42166.4	11/6/2015	14	0	0	1																												3	1	1	3	1	0	0	3	3	3	0	3
42166.4	11/6-15	13	0	0	0	1	1	1	2	0	0	0	0	0	0	0	0	0	0	0	0	0	1	1			0	1	1	0	2	3	3	2	1	2	1	0	0	3	3	2	1	3
42166.4	11	14	0	0	0	0	0	0	1	0	1	1	1	1	0	2	0	1	0	0	3	0	0	0	1	0	0	0	1	0	2	3	3	1	1	2	1	0	0	3	3	3	0	2
42166.4	11/6-15	14	1	0	0	2	2	1	1	1	0	1	1	0	0	0	0	2	2	0	0	2	1	1			0	1	2	0	1	3	3	1	1	2	1	0	0	1	3	3	0	1
42166.4	12/6/2015	14	1	0	0	0	1	0	2	1	1	1	1	1	0	0	0	0	0	0	0	0	1	1			0	0	1	1	2	3	1	1	2	2	1	1	0	1	2	2	0	2
42166.4	11/6 2015	14	0	0	0	1	1	0	2	1	1	1	1	1	0	1	0	1	1	0	0 gange	0	1	0		0	0	0	1	0	2	1	1	1	3	2	1	1	0	3	3	2	1	1
42166.4	11/06	13	0	0	0	0	0	1	1	0	1	0	0	1	1	1	1	1	1	1	5	9	1	1			0	0	3	0	0	3	3	0	3	3	0	0	0	3	3	3	3	3
42166.4	11/6-15	14	0	0	0	0	0	1	1	1	0	1	1	0	0	0	0	0	0	0	0	0	1	1			0	0	1	0	1	3	3	2	0	0	1	0	0	0	0	0	0	0
42166.4	11	14	1	0	0	1	1	0	1	1	1	1	1	0	0	2	0	7	0	0	0	0	1	1			1	0	2	0	1	3	1	1	1	2	1	0	0	3	3	3	0	1
42166.4	11-06-2015	13	0	0	0	0	1	0	2	1	1	1	1	1	1	1	1	0	0	0	0	0	1	1			0	0	0	0	0	3	1	1	0	0	0	0	0	0	0	0	0	0
42166.4	11/06-2015	14	1	0	0	0	0	0	2	1	1	1	1	1	0	0	0	0	0	0	0	0	1	1			0	0	0	0	3	3	1	2	2	3	1	0	1	3	3	3	1	2
42166.4	11-06-2015	15	1	0	0	2	2	0	2	0	0	1	1	0	0	0	0	1	1	0	0	1	1	1			1	1	2	1	2	1	1	1	0	0	1	2	1	1	2	2	0	0
42166.4	11/6	14	1	0	0	2	1	0	1	1	1	1	1	0	1	6	0	26	0	0	0	5	1	0	1	0	1	1	2	1	1	1	3	2	0	1	1	0	0	0	3	1	2	1
42166.4	8/6 2015	14	0	0	0	2	1	0	0	0	0	0	1	1	0	0	0	1	0	0	0	1	1	1			1	0	1	0	2	3	1	2	0	1	1	0	0	3	3	1	0	1
42166.4	11/6	14	1	0	0	1	1	1	1	0	1	0	0	0	0	2	1	4	2	0	0	0	1	1			1	0	1	0	1	1	3	1	1	2	0	1	0	1	2	1	1	2
42166.4	11/06 2015	14	1	0	0	2	1	0	1	0	1	0	1	0	0	5	3	16	4	7	0	10	1	0	1	2	1	0	3	1	1	1	1	1	0	1	1	1	0	3	2	2	3	0
42166.4	11-06-2015	13	1	0	0	3	1	1	0	1	0	0	1	1	0	1	0	0	0	0	0	1	0	1			1	1	3	0	1	0	1	1	3	3	2	0	0	2	3	1	2	2
42166.4	11. Juni	14	0	0	0	3	1	0	1	1	0	0	1	0	0	0	0	1	1	0	0	1	1	1			0	1	1	0	1	3	1	1	2	2	1	0	0	2	3	2	0	2
42166.4	11/6	15	1	0	0	2	0	0	2	1	1	1	1	0	0	4	0	15	0	0	0	0	1	1			1	0	1	1	1	3	3	1	1	2	1	1	1	2	3	2	1	1
42166.4	6	14	0	0	1																												3	0	3	3	0	0	0	3	3	3	0	0
42166.5	11/6/15	13	1	0	0	3	2	0	1	1	1	0	1	0	0	3	2	5	3	0	0	0	1	1			0	0	2	0	0	1	2	2	1	2	1	1	0	2	2	3	0	0
42166.5	11/6	14	1	1	1																												1	2	2	3	1	0	0	2	3	3	0	2
42166.5	11.06.2015	13	1	1	1																												1	1	0	1	3	1	0	1	2	2	1	2
42166.5	11/6	13	1	0	0	2	1	1	2	0	0	1	1	1	0	4	0	10	0	2	1	3	1	0	Ikke slemt	Nej	1	1	2	0	2	3	2	2	2	2	1	1	1	2	2	3	1	1
42166.5	11/05/15	13	0	0	1																												0	1	2	2	1	0	0	3	3	2	1	1
42166.5	11/6	13	1	0	0	1	2	0	2	1	1	1	1	0	0	1	1	3	3	2	0	0	1	1	Havde ikke hovedpine i går	Nej	3	1	1	1	1	3	1	1	1	3	1	0	1	1	2	3	0	0
42166.5	11/6	14	1	0	0	0	0	1	1	0	0	1	1	1	0	1	1	0	0	0	0	0	1	0	Ikke slemt	Nej	0	0	0	0	2	3	0	0	3	3	1	0	0	2	2	3	0	3
42166.5	11-06-2015	14	0	0	0	1	1	1	1	1	1	1	1	0	1	1	0	0	0	0	0	0	1	1	Ikke slemt	Nej	0	0	1	0	2	0	1	1	1	1	0	0	0	3	3	3	0	2
42166.5	11.06.2015	13	1	0	0	2	0	0	1	1	1	1	1	0	0	0	0	0	0	0	0	0	1	1	Havde ikke hovedpine i går	Nej	0	0	3	0	0	3	1	0	0	2	0	0	0	0	3	3	0	1
		12	0	0	0	0	0	1	1	1	1		1	0	0	0	0	1		0	1	0	1	1			0	1	2	0	0	0	2	2	2	2	1	0	1	2	2	2	1	2
		12	1	0	0	0	0	0	1	1	1	1	1	0	0	0	0	0	0	0	1	0	1	1			0	0	2	0	1	0	2	2	2	3	1	0	0	2	2	2	1	2
		14	1	0	0	1	1	1	1	1	0	0	1	0	0	1	1	1	0	0	1	0	1	0	2	0	0	2	0	0	0	0	1	2	1	2	2	1	0	1	1	1	1	1
		14	0	0	1	1	1	1	1	0	0	0	1	0	0	0	0	0	1	0	1	1	1	1	1		0	0	2	0	0	0	1	2	1	2	2	1	0	1	1	2	0	2
		12	0	0	0	0	1	0	1	0	0	1	1	1	0	1	1	3	2	0	0	0	1	1			1	1		3	0	0	0	1	1	1	1	2	1	0	2	1	3	1
		12	1	0	0	2	0	0	1	1	1	1	1	0	0	1	0	8	0	0	0	3	1	0	1	1	1	1	2	1	1	2	1	2	1	1	2	2	0	2	2	3	1	1
