# Supplementary material for: Translation and validation of the Child and the Adolescent HARDSHIP (Headache-attributed restriction, disability, social handicap and impaired participation) questionnaire into Danish language
Source: PubMed Central journal article supplement (PMC4841233; doi:10.7717/peerj.1927), 2016-04-14
Supplement: peerj-04-1927-s002.pdf [file peerj-04-1927-s002.pdf]

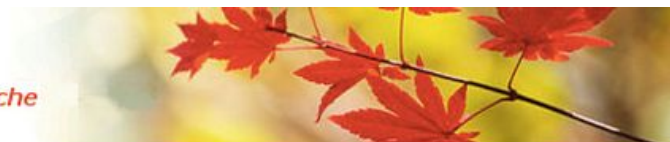

## Global kampagne mod hovedpine

Et selv-administrerede spørgeskema til børn i aldersgruppen 12 -17år

Formål

### 1.Hvilken dato er det i dag?\*

Dag Måned 2015

### 2. Hvor gammel er du?\*.Marker hvor gammel du er

- 12 år
- 13 år
- 14 år
- 15 år
- 16 år
- 17 år

### 3. Er du en dreng eller en pige ?\*

- Dreng
- Pige

## Screeningsspørgsmål

### 4. Har du nogensinde haft hovedpine?\*

- Ja
- nej

### 5. Har du haft hovedpine indenfor det sidste år ?

\*.Vælg ja eller nej - Har du svaret nej - fortsættes direkte til spørgsmål 33Janej

## Diagnosticerende spørgsmål

Nedenstående spørgsmål skal beskrive din hovedpine

### 6. Hvor lang tid plejer din hovedpine at vare?\*.Sæt kryds

- under 1 time
- 1-2 timer
- 2-4 timer
- mere end 4 timer

**7. Hvor slem er din hovedpine?\***

- ikke slemt
- slem
- meget slem

**8. Hvordan beskrives bedst din hovedpine?\*** Sæt kryds ved den, der beskriver det bedst

- Dunkende eller pulserende - som et hjerteslag
- Trykkende

**9. Mærker du normalt din hovedpine i den ene side af hovedet , i midten eller i begge sider?\***

Sæt kryds

- Kun én side
- I midten
- Begge sider

**10. Får bevægelse ( f.eks gang eller at gå på trapper) din hovedpine til at blive værre?\***

Sæt kryds

- nej
- ja

**11. Undgår du bevægelse, (f.eks gang eller at gå på trapper ), når du har hovedpine\***

Sæt kryds

- nej
- ja

**12. Føler du dig syg, når du har hovedpine? ( f.eks som om du skal kaste op)\*.**

Sæt kryds

- nej
- ja

**13. Er du syg, når du har hovedpine ( kaster du f.eks op)\*.**Sæt kryds

- nej
- ja

**14. Kan du bedst lide at være i mørke, når du har hovedpine?\*** sæt kryds

- nej
- ja

**15. Kan du bedst lide, at der er stille omkring dig , når du har hovedpine\*.**sæt kryds

- nej
- ja

## Spørgsmål om påvirkning/konsekvenser

De næste spørgsmål handler om, hvordan hovedpinen påvirker din hverdag.

### De første to spørgsmål handler om den sidste uge

**16. Hvor mange dage har du haft hovedpine i løbet af den sidste uge\*.**

Skriv antal dage mellem 0 og 7

**17. Hvor mange dage i løbet af den sidste uge har du taget medicin eller piller på grund af din hovedpine?\***

Skriv antal dage mellem 0 og 7

### De næste spørgsmål omhandler de sidste fire uger.

**18. Hvor mange dage i løbet af de sidste fire uger har du haft hovedpine ?\***

Skriv et tal mellem 0 og 28

**19. Hvor mange dage i løbet af de sidste fire uger har du taget medicin eller piller på grund af din hovedpine\*.**Skriv venligst et tal mellem 0 og 28

**20. Hvor mange dage, i løbet af de sidste fire uger, har du ikke været i skole på grund af hovedpine?\***Indtast venligst et tal mellem 0 og 20

**21. Hvor mange dage i løbet af de sidste fire uger er du taget tidligere hjem fra skole på grund af hovedpine?\***Skriv venligst et tal mellem 0 og 20

**22. Hvor mange dage i løbet af de sidste fire uger, har du ikke kunne gøre ting du gerne ville på grund af din hovedpine? \***Skriv venligst et tal mellem 0 og 28

**23. Har dine forældre i løbet af de sidste fire uger, været hjemme fordi du havde hovedpine?\***

Hvis ja, skriv hvor mange dage ialt

- ja
- nej
- Andet:

## Spørgsmål om i går

24. Havde du hovedpine i går ?\* Hvis du svarer nej, fortsæt da derefter til spørgsmål 27

- Nej
- Ja

25. Hvor slemt var det ?\* Marker

- Ikke slemt
- Ret slemt
- Meget slemt

26. Gik du glip af skolen i går ?\*.Marker dit svar

- Nej
- ja, jeg tog tidligere hjem
- ja, jeg blev hjemme

## Flere spørgsmål om påvirkning/konsekvens

Tænk på dit liv de sidste fire uger, når du besvarer de næste spørgsmål.

27. Jeg har været bekymret for at få hovedpine\*.Marker dit svar

- Aldrig
- nogle gange
- Ofte
- altid

28. Jeg måtte ikke lave noget for mine forældre, fordi jeg havde hovedpine\*.Marker dit svar

- aldrig
- nogle gange
- ofte
- altid

29. Jeg kunne ikke koncentrere mig, fordi jeg havde hovedpine\*.Marker dit svar

- aldrig
- nogle gange
- ofte
- altid

**30. Jeg har været ked af det på grund af min hovedpine\*** Marker dit svar

- aldrig
- nogle gange
- ofte
- altid

**31. Jeg har været i stand til at afhjælpe min hovedpine\*** Marker dit svar

- aldrig
- nogle gange
- ofte
- altid

**32. Jeg ville ikke have, at nogen skulle opdage, at jeg havde hovedpine** Marker dit svar

- aldrig
- nogen gange
- ofte
- altid

## De resterende spørgsmål SKAL alle svare på.

Spørgsmål om livskvalitet ( med og uden hovedpine)

Tænk på dit liv i de sidste 4 uger når du besvarer de næste spørgsmål. Det handler Ikke om hovedpine, men om dit liv generelt

**33. Jeg har følt mig syg\*** Marker dit svar

- aldrig
- nogle gange
- ofte
- altid

**34. Jeg har været træt og udmattet\*** Marker dit svar

- aldrig
- nogle gange
- ofte
- altid

**35. Jeg har haft en masse energi\*** Marker dit svar

- aldrig
- nogle gange
- ofte
- altid

**36. Jeg har haft det sjovt og har grinet meget\*** Skal udfyldes Marker dit svar

- aldrig
- nogle gange
- ofte
- altid

**37. Jeg har kedet mig\*** Skal udfyldes Marker dit svar

- aldrig
- nogle gange
- ofte
- altid

**38. Jeg har følt mig alene\*** Skal udfyldes Marker dit svar

- aldrig
- nogle gange
- ofte
- altid

**39. Jeg har været bange\*** Skal udfyldes Marker dit svar

- aldrig
- nogle gange
- ofte
- altid

**40. Jeg har været glad for mig selv\*** Skal udfyldes Marker dit svar

- aldrig
- nogle gange
- ofte
- altid

**41. Jeg har haft det godt derhjemme\*** Skal udfyldes Marker dit svar

- aldrig
- nogle gange
- ofte
- altid

**42. Jeg har haft det fint med mine venner\*** Skal udfyldes Marker dit svar

- aldrig
- nogle gange
- ofte
- altid

**43. Jeg har følt mig anderledes i forhold til andre børn**Marker dit svar

- aldrig
- nogle gange
- ofte
- altid

**44. Det har været nemt at lave mine lektier\***Skal udfyldesMarker dit svar

- aldrig
- nogle gange
- ofte
- altid

**Så er spørgeskemaet slut. Husk at trykke på SEND.**

Mange tak fordi du ville være med til at besvare det.

God dag
